# Supplementary material for: Mechanochemical synthesis and structural analysis of trivalent lanthanide and uranium diphenylphosphinodiboranates
Source: Royal Society of Chemistry journal article supplement (doi:10.1039/d1dt01932e), 2021-01-01
Supplement: d1dt01932e1.pdf [file d1dt01932e1.pdf]

SUPPORTING INFORMATION

Mechanochemical Synthesis and Structural Analysis of Trivalent Lanthanide and Uranium Diphenylphosphinodiboranates

Taylor V. Fetrow and Scott R. Daly\*

Department of Chemistry, The University of Iowa, E331 Chemistry Building, Iowa City, Iowa 52242, United States

Corresponding email: [scott-daly@uiowa.edu](mailto:scott-daly@uiowa.edu)

**Table of Contents**

|                                                |               |
|------------------------------------------------|---------------|
| Tabulated crystallographic data                | pp. S2        |
| Molecular structure of <b>3</b>                | pp. S3        |
| <sup>1</sup> H and <sup>11</sup> B NMR spectra | pp. S4 – S11  |
| IR spectra                                     | pp. S12 – S14 |

**Table S1.** Single-crystal X-ray diffraction data for U(H<sub>3</sub>BPPPh<sub>2</sub>BH<sub>3</sub>)<sub>3</sub> (**1a**) and (**1b**), Ce(H<sub>3</sub>BPPPh<sub>2</sub>BH<sub>3</sub>)<sub>3</sub> (**2**), Pr(H<sub>3</sub>BPPPh<sub>2</sub>BH<sub>3</sub>)<sub>3</sub> (**3**), Nd(H<sub>3</sub>BPPPh<sub>2</sub>BH<sub>3</sub>)<sub>3</sub> (**4**), Nd(H<sub>3</sub>BPPPh<sub>2</sub>BH<sub>3</sub>)<sub>3</sub>(THF)<sub>3</sub> (**4-THF**), U(H<sub>3</sub>BPH<sub>2</sub>BH<sub>3</sub>)I<sub>2</sub>(THF)<sub>3</sub> (**5**).

|                                                       | <b>1a</b>                                                                     | <b>1b</b>                                                                     | <b>2</b>                                                                       | <b>3</b>                                                                       | <b>4</b>                                                                       | <b>4-THF</b>                                                                   | <b>5</b>                                                                        |
|-------------------------------------------------------|-------------------------------------------------------------------------------|-------------------------------------------------------------------------------|--------------------------------------------------------------------------------|--------------------------------------------------------------------------------|--------------------------------------------------------------------------------|--------------------------------------------------------------------------------|---------------------------------------------------------------------------------|
| Formula                                               | C <sub>72</sub> H <sub>96</sub> B <sub>12</sub> P <sub>6</sub> U <sub>2</sub> | C <sub>72</sub> H <sub>96</sub> B <sub>12</sub> P <sub>6</sub> U <sub>2</sub> | C <sub>72</sub> H <sub>96</sub> B <sub>12</sub> Ce <sub>2</sub> P <sub>6</sub> | C <sub>72</sub> H <sub>96</sub> B <sub>12</sub> P <sub>6</sub> Pr <sub>2</sub> | C <sub>72</sub> H <sub>96</sub> B <sub>12</sub> Nd <sub>2</sub> P <sub>6</sub> | C <sub>48</sub> H <sub>72</sub> B <sub>6</sub> NdO <sub>3</sub> P <sub>3</sub> | C <sub>12</sub> H <sub>24</sub> B <sub>2</sub> I <sub>2</sub> O <sub>3</sub> PU |
| FW (g mol <sup>-1</sup> )                             | 1753.08                                                                       | 1753.08                                                                       | 1557.26                                                                        | 1558.84                                                                        | 1565.5                                                                         | 999.06                                                                         | 760.73                                                                          |
| crystal system                                        | triclinic                                                                     | monoclinic                                                                    | triclinic                                                                      | monoclinic                                                                     | monoclinic                                                                     | triclinic                                                                      | orthorhombic                                                                    |
| space group                                           | P-1                                                                           | P2 <sub>1</sub> /c                                                            | P-1                                                                            | P2 <sub>1</sub> /c                                                             | P2 <sub>1</sub> /c                                                             | P-1                                                                            | Pbcn                                                                            |
| a (Å)                                                 | 11.4764(14)                                                                   | 18.8498(19)                                                                   | 11.4324(11)                                                                    | 37.239(4)                                                                      | 18.826(3)                                                                      | 11.5469(19)                                                                    | 9.5213(11)                                                                      |
| b (Å)                                                 | 12.8102(15)                                                                   | 9.6187(10)                                                                    | 12.7542(13)                                                                    | 9.6296(10)                                                                     | 9.6646(17)                                                                     | 14.970(3)                                                                      | 15.3494(17)                                                                     |
| c (Å)                                                 | 15.1334(18)                                                                   | 23.960(2)                                                                     | 28.438(3)                                                                      | 23.924(2)                                                                      | 23.904(4)                                                                      | 17.592(3)                                                                      | 15.8099(18)                                                                     |
| α (deg)                                               | 104.030(5)                                                                    | 90                                                                            | 94.057(5)                                                                      | 90                                                                             | 90                                                                             | 97.233(5)                                                                      | 90                                                                              |
| β (deg)                                               | 100.044(5)                                                                    | 109.622(5)                                                                    | 94.695(5)                                                                      | 107.636(5)                                                                     | 109.675(5)                                                                     | 96.868(5)                                                                      | 90                                                                              |
| γ (deg)                                               | 107.371(5)                                                                    | 90                                                                            | 107.346(5)                                                                     | 90                                                                             | 90                                                                             | 111.125(5)                                                                     | 90                                                                              |
| volume (Å <sup>3</sup> )                              | 1985.5(4)                                                                     | 4091.9(7)                                                                     | 3924.9(7)                                                                      | 8175.9(14)                                                                     | 4095.3(12)                                                                     | 2768.9(9)                                                                      | 2310.6(5)                                                                       |
| Z                                                     | 1                                                                             | 2                                                                             | 2                                                                              | 4                                                                              | 2                                                                              | 2                                                                              | 4                                                                               |
| ρ <sub>calc</sub> (g cm <sup>-3</sup> )               | 1.466                                                                         | 1.423                                                                         | 1.318                                                                          | 1.266                                                                          | 1.27                                                                           | 1.198                                                                          | 2.187                                                                           |
| μ (mm <sup>-1</sup> )                                 | 4.232                                                                         | 4.107                                                                         | 1.306                                                                          | 1.332                                                                          | 1.408                                                                          | 1.059                                                                          | 9.77                                                                            |
| F (000)                                               | 862                                                                           | 1724                                                                          | 1588                                                                           | 3184                                                                           | 1596                                                                           | 1038                                                                           | 1372                                                                            |
| θ range (deg)                                         | 2.521/26.407                                                                  | 2.396/26.446                                                                  | 2.8725/27.865                                                                  | 1.703/26.431                                                                   | 2.293/26.313                                                                   | 2.061/26.352                                                                   | 2.517/28.278                                                                    |
| R (int)                                               | 0.0488                                                                        | 0.0801                                                                        | 0.0508                                                                         | 0.1012                                                                         | 0.1449                                                                         | 0.0877                                                                         | 0.0427                                                                          |
| data/restraints/parameters                            | 8109/0/367                                                                    | 8365/625/399                                                                  | 18483/0/841                                                                    | 16695/42/712                                                                   | 8303/195/324                                                                   | 11206/24/493                                                                   | 2777/2/88                                                                       |
| GOF                                                   | 1.005                                                                         | 1.026                                                                         | 1.038                                                                          | 1.012                                                                          | 1.012                                                                          | 1.034                                                                          | 1.084                                                                           |
| R <sub>1</sub> [I > 2σ(I)] <sup>a</sup>               | 0.0384                                                                        | 0.0474                                                                        | 0.0381                                                                         | 0.0575                                                                         | 0.0679                                                                         | 0.0658                                                                         | 0.0548                                                                          |
| wR <sub>2</sub> (all data) <sup>b</sup>               | 0.0787                                                                        | 0.1143                                                                        | 0.0704                                                                         | 0.124                                                                          | 0.1726                                                                         | 0.1634                                                                         | 0.1727                                                                          |
| Largest Peak/Hole (e <sup>-</sup> · Å <sup>-3</sup> ) | 1.916/-1.872                                                                  | 1.662/-1.989                                                                  | 2.151/-2.047                                                                   | 2.054/-1.241                                                                   | 0.775/-1.618                                                                   | 2.474/-1.268                                                                   | 4.078/-3.495                                                                    |
| Temp (K)                                              | 150(2)                                                                        | 150(2)                                                                        | 100(2)                                                                         | 150(2)                                                                         | 150(2)                                                                         | 150(2)                                                                         | 150(2)                                                                          |

<sup>a</sup>R<sub>1</sub> =  $\sum |F_o| - |F_c|$  /  $\sum |F_o|$  for reflections with  $F_o^2 > 2\sigma(F_o^2)$ .

<sup>b</sup>wR<sub>2</sub> =  $[\sum w(F_o^2 - F_c^2)^2 / \sum (F_o^2)^2]^{1/2}$  for all reflections.

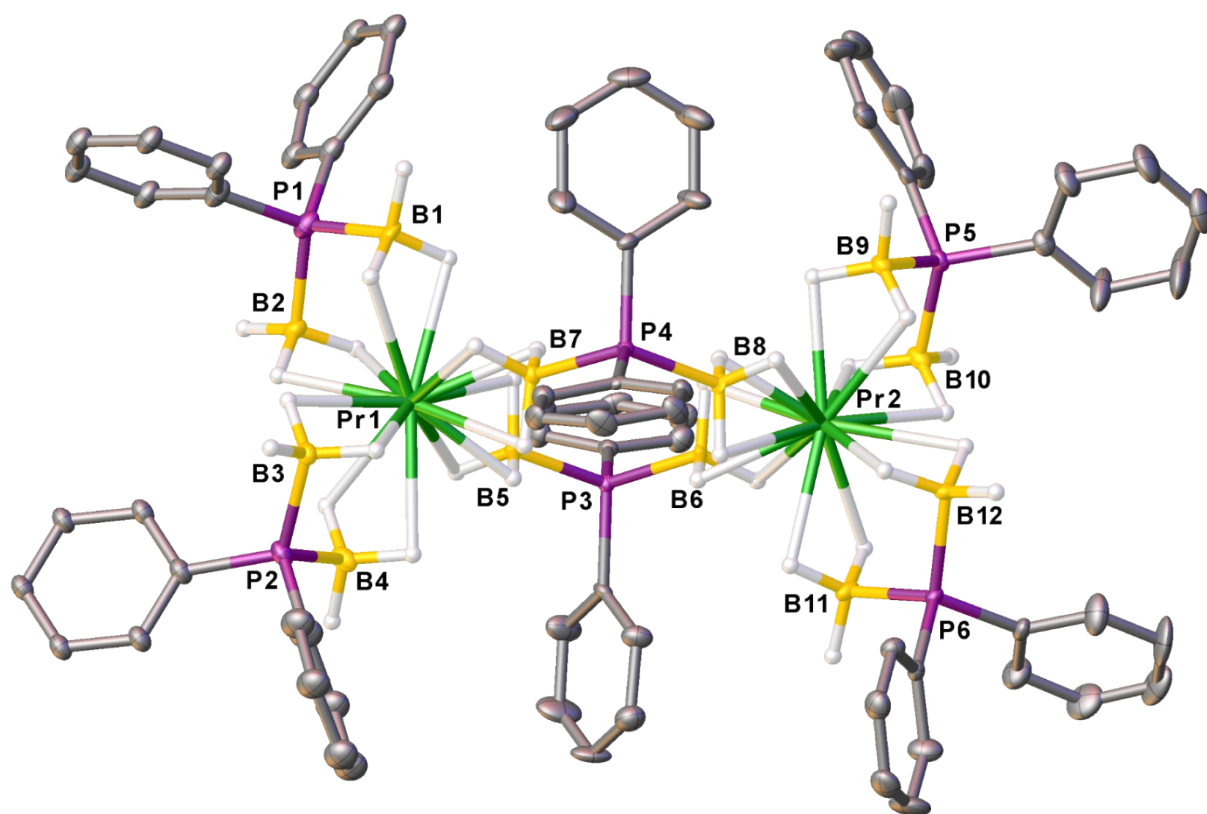

**Figure S1.** Molecular structure of  $\text{Pr}(\text{H}_3\text{BPPPh}_2\text{BH}_3)_3$  (**3**) with thermal ellipsoids shown at 35% probability. All phenyl hydrogen atoms were omitted from the figure.

## NMR Spectra

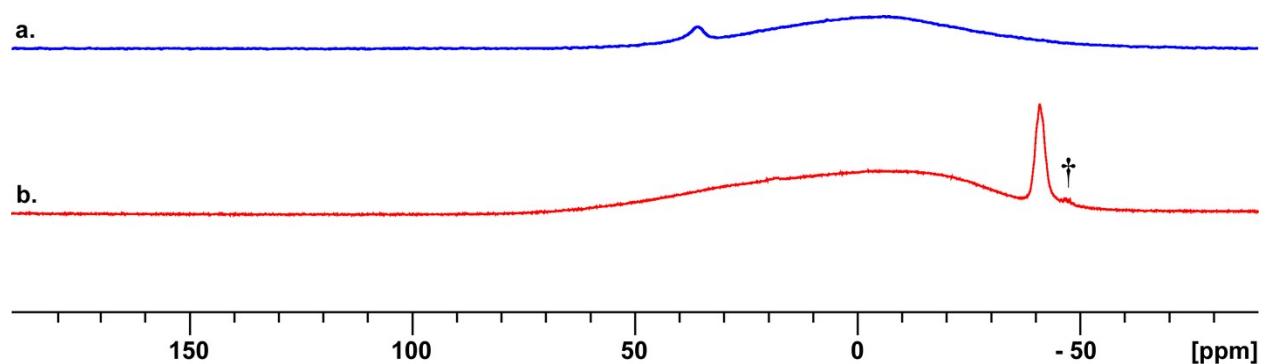

**Figure S2.** a)  $^{11}\text{B}$  NMR spectra of crystalline  $\text{Nd}(\text{H}_3\text{BPPH}_2\text{BH}_3)_3$  (**4**) in THF. b)  $^{11}\text{B}$  NMR spectrum of  $\text{NdI}_3$  and three equiv. of  $\text{K}(\text{H}_3\text{BPPH}_2\text{BH}_3)$  stirred in 20 mL of THF for 24 h. The † is assigned to a small amount of hydrolysis.

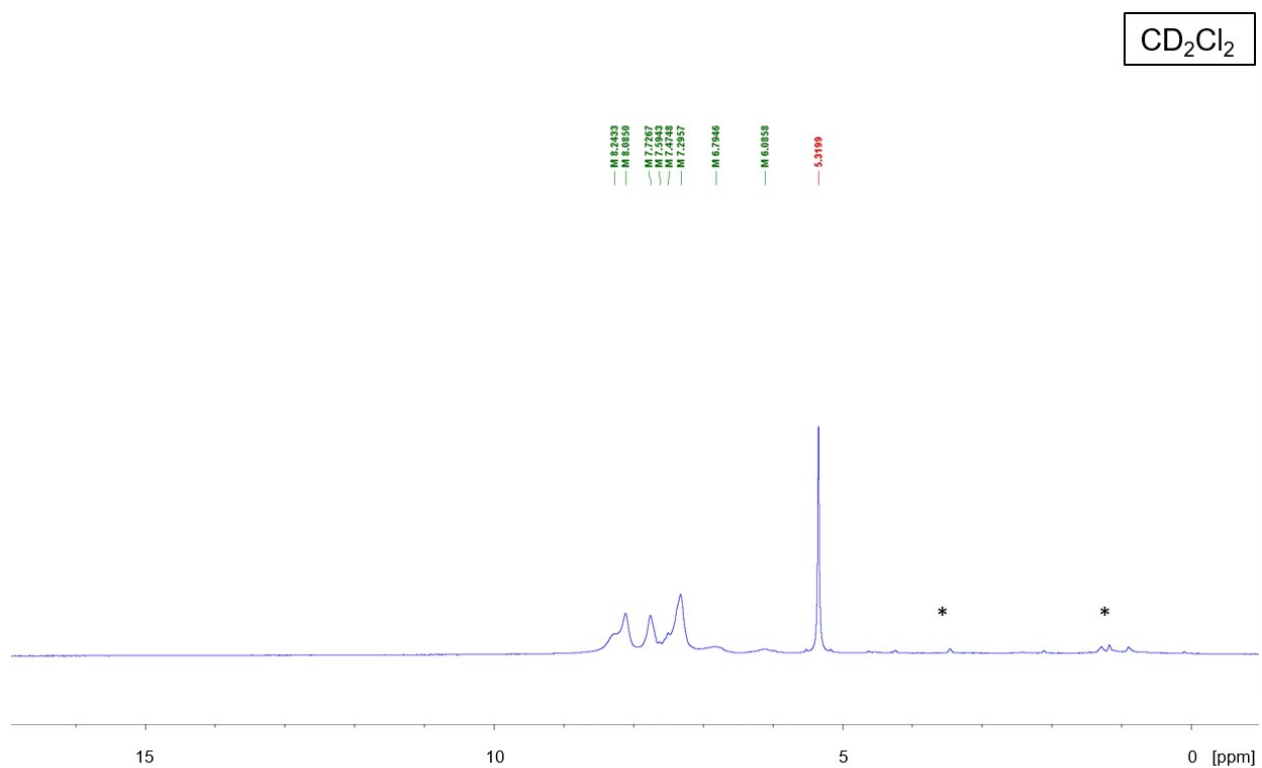

**Figure S3.**  $^1\text{H}$  NMR spectrum of the phenyl resonances for  $\text{U}(\text{H}_3\text{BPPH}_2\text{BH}_3)_3$  (**1a**) and (**1b**). The \* symbol indicates resonances assigned to residual silicon grease, pentane, and  $\text{Et}_2\text{O}$ .

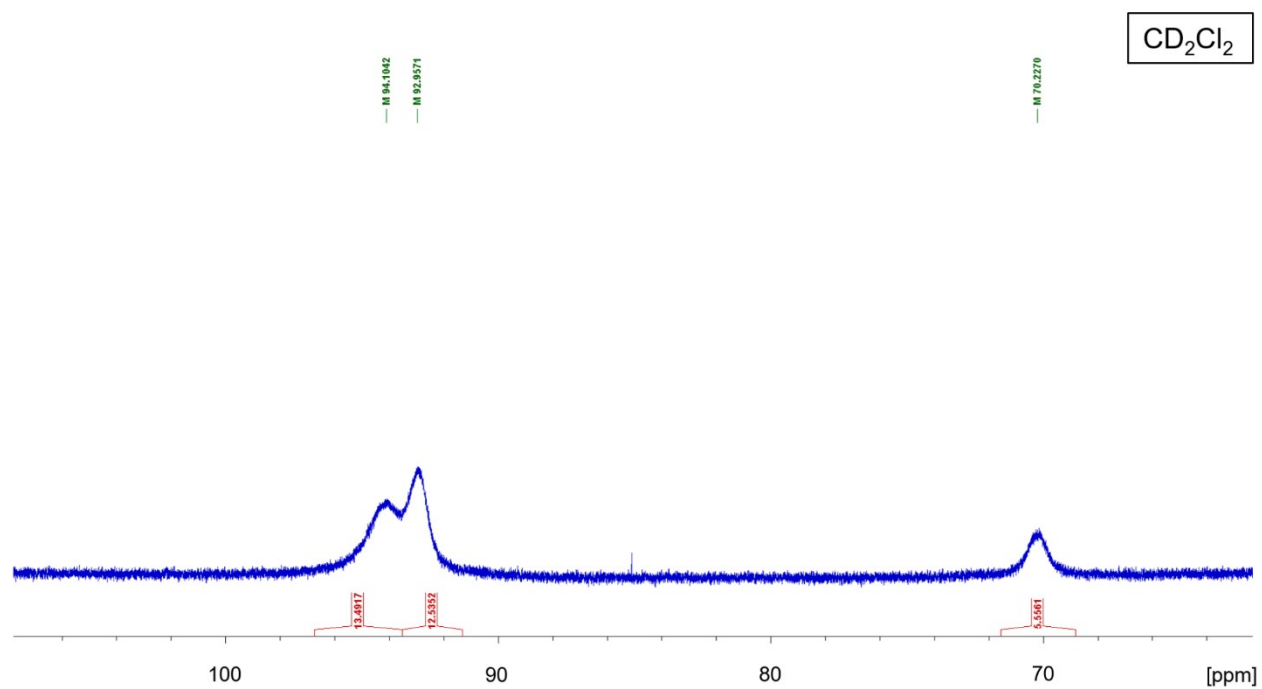

**Figure S4.** <sup>1</sup>H NMR spectrum of the BH<sub>3</sub> resonances for U(H<sub>3</sub>BPPH<sub>2</sub>BH<sub>3</sub>)<sub>3</sub> (**1a**) and (**1b**).

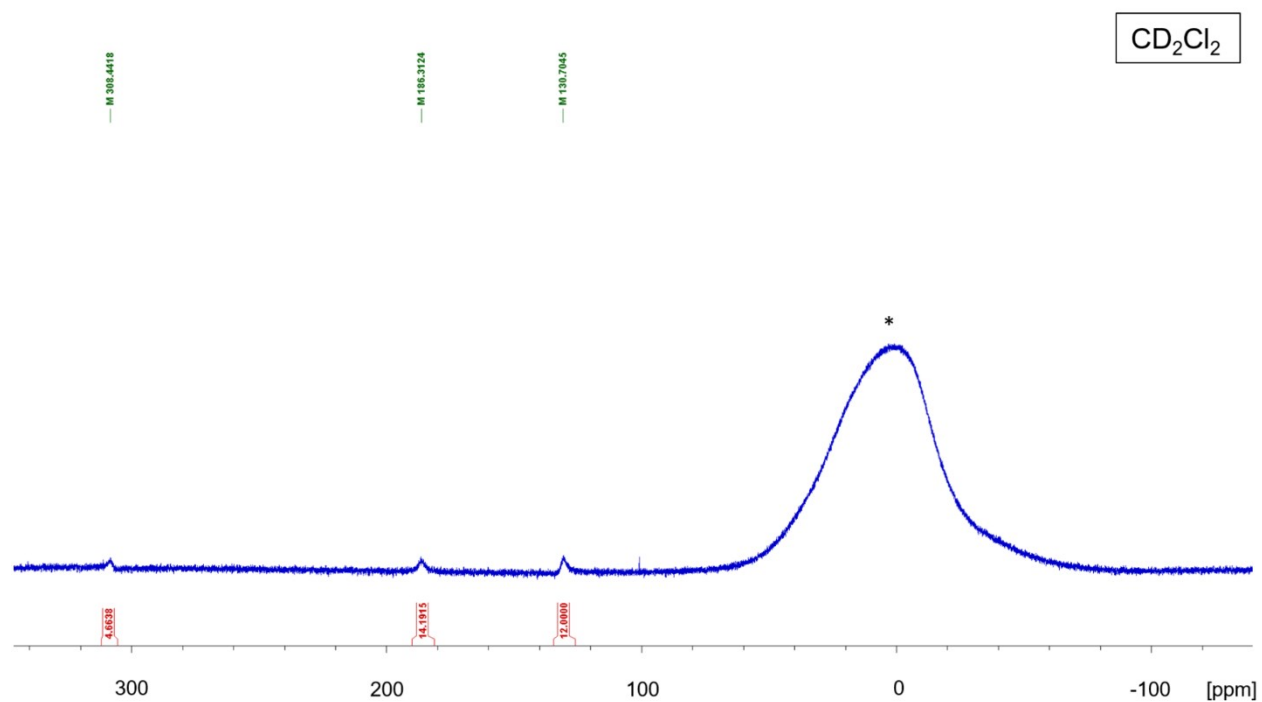

**Figure S5.** <sup>11</sup>B NMR spectrum of the BH<sub>3</sub> resonances for U(H<sub>3</sub>BPPH<sub>2</sub>BH<sub>3</sub>)<sub>3</sub> (**1a**) and (**1b**). The \* symbol indicates a resonance assigned to borosilicate within the instrument.

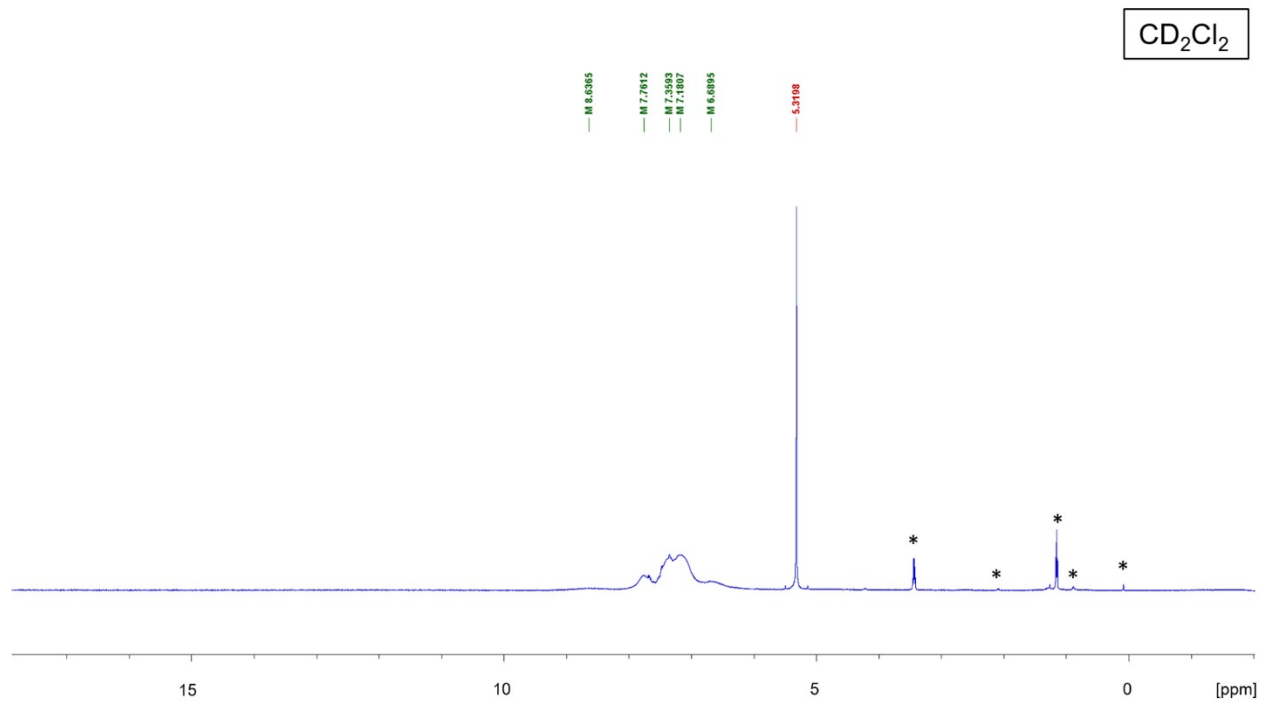

**Figure S6.**  $^1\text{H}$  NMR spectrum of the phenyl resonances for  $\text{Ce}(\text{H}_3\text{BPPPh}_2\text{BH}_3)_3$  (**2**). The \* symbol indicates resonances assigned to residual silicon grease, pentane, and  $\text{Et}_2\text{O}$ .

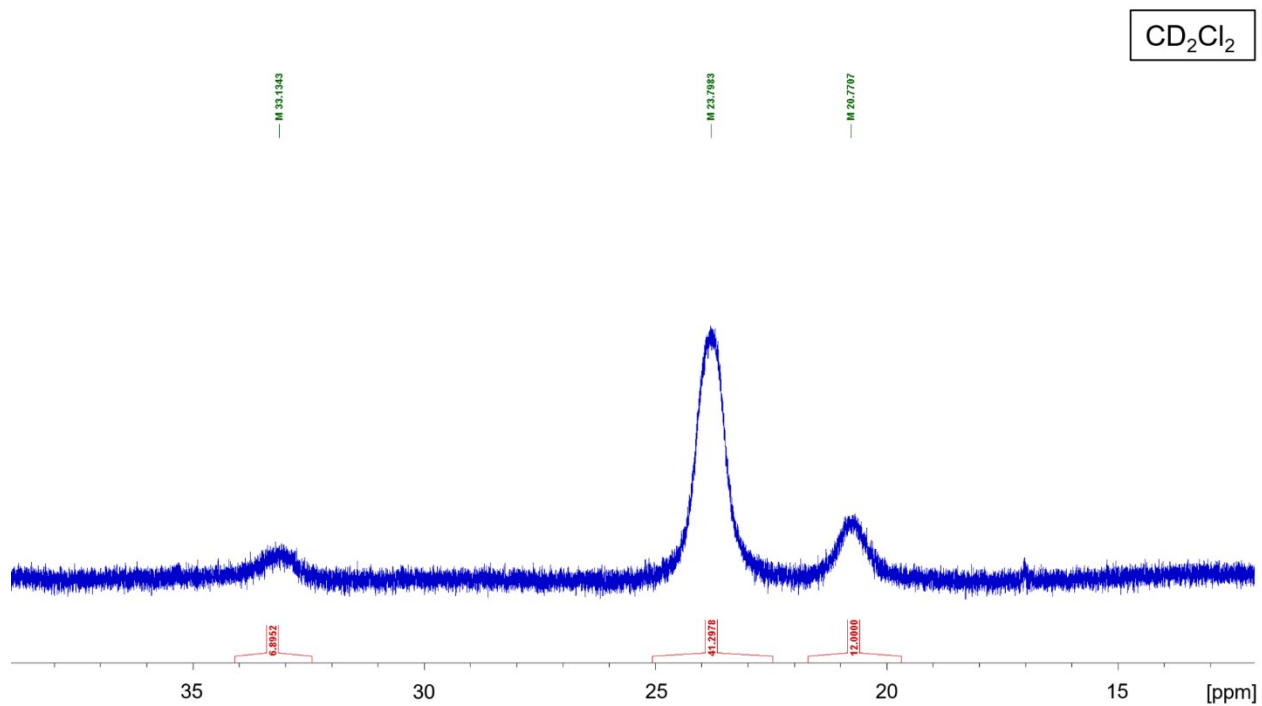

**Figure S7.**  $^1\text{H}$  NMR spectrum of the  $\text{BH}_3$  resonances for  $\text{Ce}(\text{H}_3\text{BPPPh}_2\text{BH}_3)_3$  (**2**).

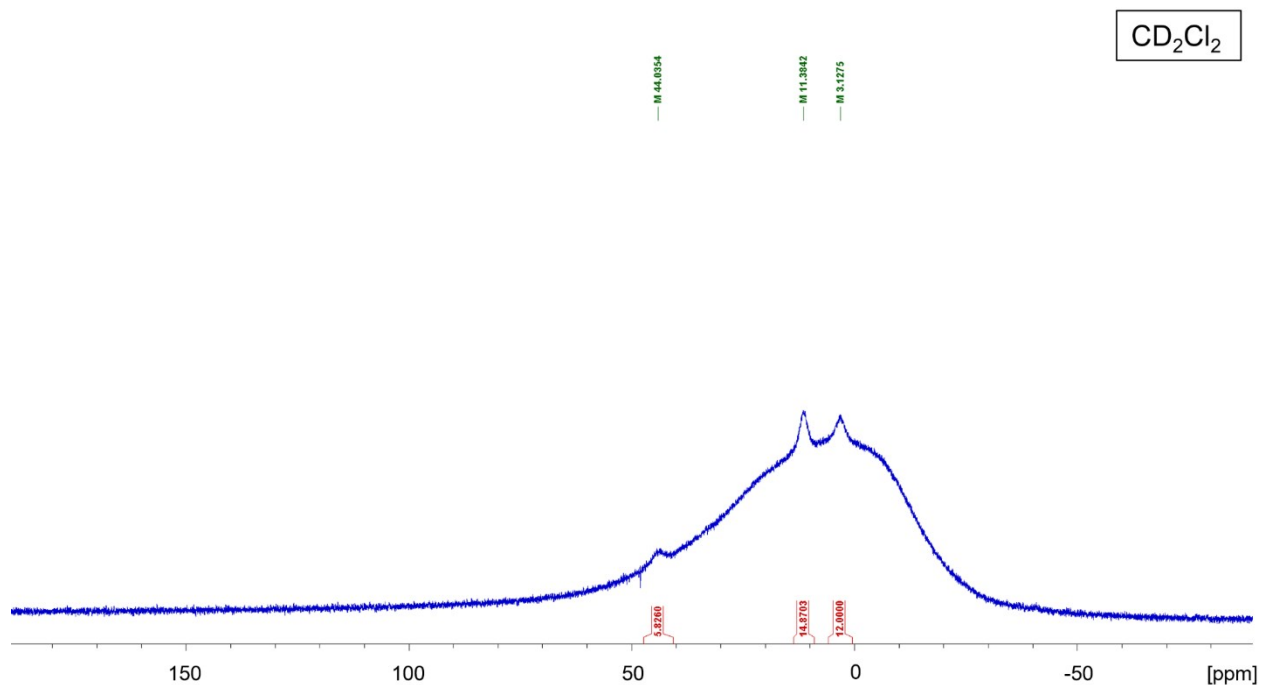

**Figure S8.** <sup>11</sup>B NMR spectrum of the BH<sub>3</sub> resonances for Ce(H<sub>3</sub>BPPH<sub>2</sub>BH<sub>3</sub>)<sub>3</sub> (**2**). The large broad feature extending from δ 80 to -50 is assigned to borosilicate inside of the instrument.

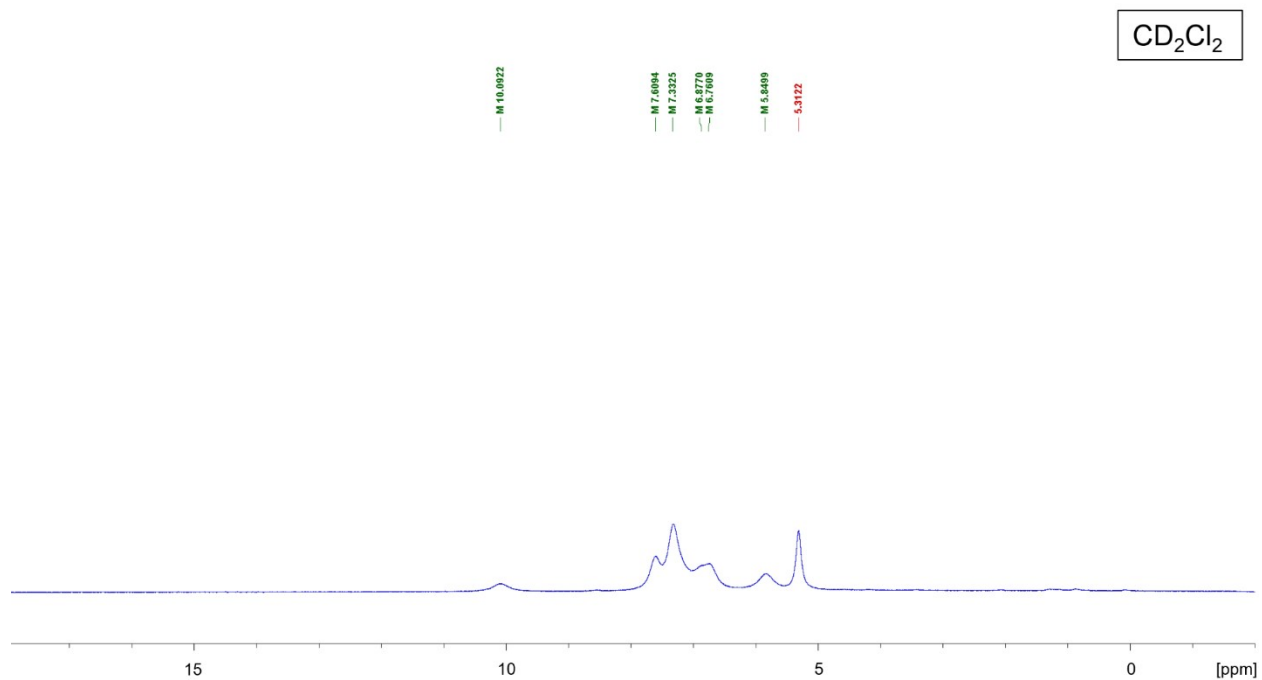

**Figure S9.** <sup>1</sup>H NMR spectrum of the phenyl resonances for Pr(H<sub>3</sub>BPPH<sub>2</sub>BH<sub>3</sub>)<sub>3</sub> (**3**).

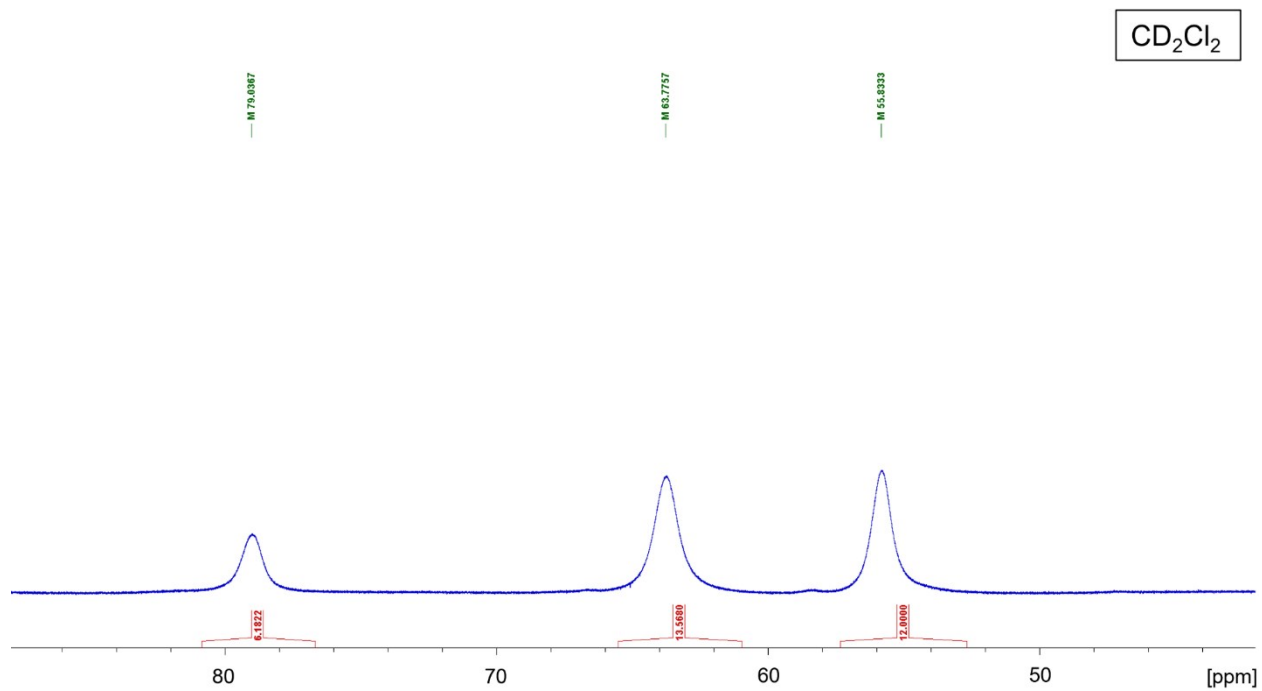

**Figure S10.** <sup>1</sup>H NMR spectrum of the BH<sub>3</sub> resonances for Pr(H<sub>3</sub>BPPH<sub>2</sub>BH<sub>3</sub>)<sub>3</sub> (**3**).

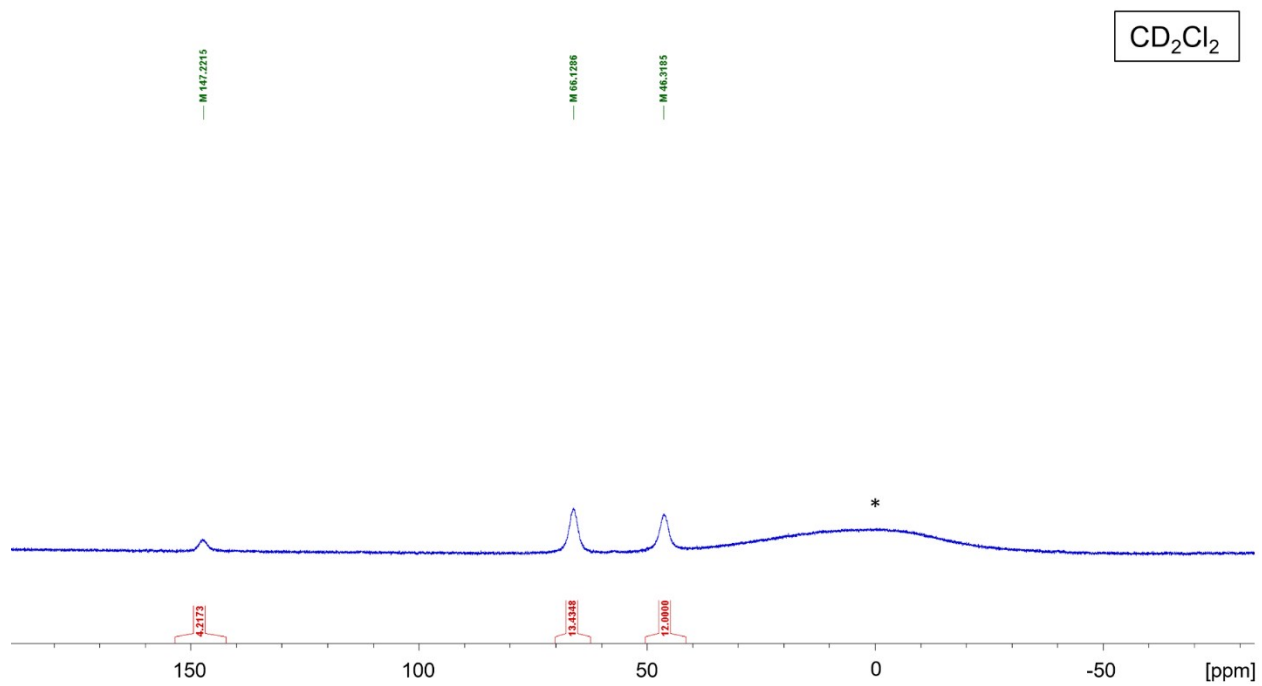

**Figure S11.** <sup>11</sup>B NMR spectrum of the BH<sub>3</sub> resonances for Pr(H<sub>3</sub>BPPH<sub>2</sub>BH<sub>3</sub>)<sub>3</sub> (**3**). The \* symbol indicates a resonance assigned to borosilicate within the instrument.



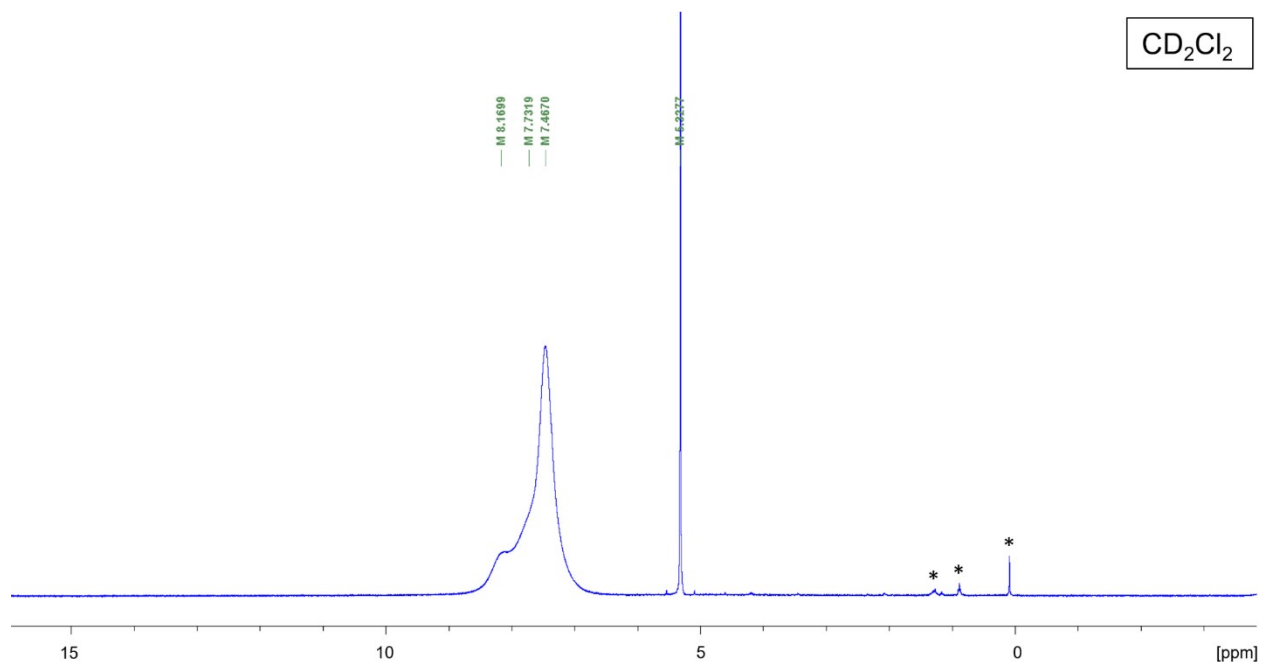

**Figure S12.**  $^1\text{H}$  NMR spectrum of the phenyl resonances for  $\text{Nd}(\text{H}_3\text{BPPH}_2\text{BH}_3)_3$  (**4**). The \* symbol indicates resonances assigned to residual silicon grease and pentane.

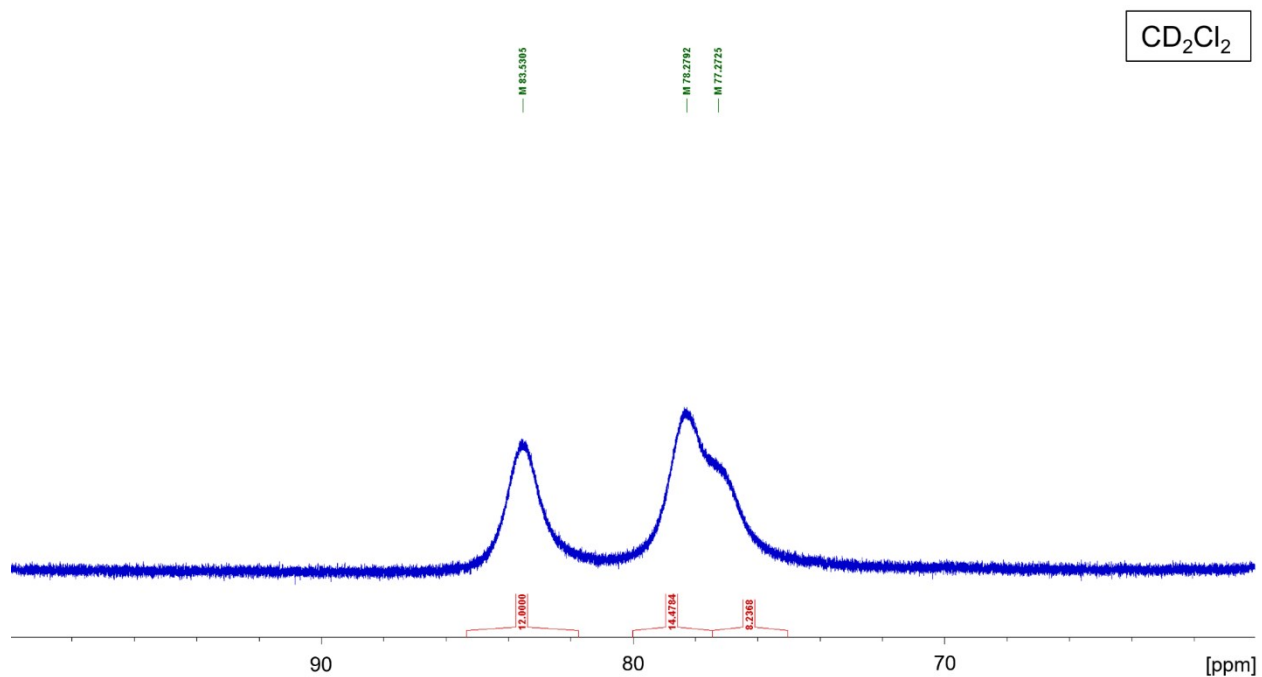

**Figure S13.**  $^1\text{H}$  NMR spectrum of the  $\text{BH}_3$  resonances for  $\text{Nd}(\text{H}_3\text{BPPH}_2\text{BH}_3)_3$  (**4**).

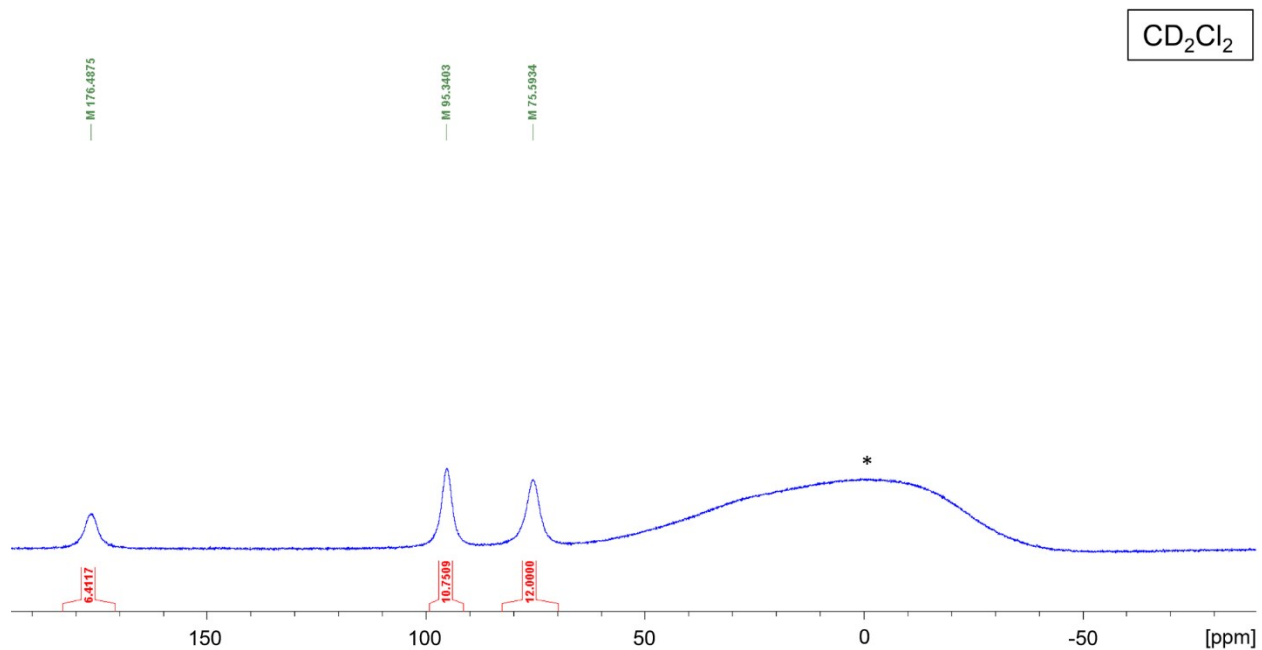

**Figure S14.**  $^{11}\text{B}$  NMR spectrum of the  $\text{BH}_3$  resonances for  $\text{Nd}(\text{H}_3\text{BPPPh}_2\text{BH}_3)_3$  (**4**). The \* symbol indicates a resonance assigned to borosilicate within the instrument.

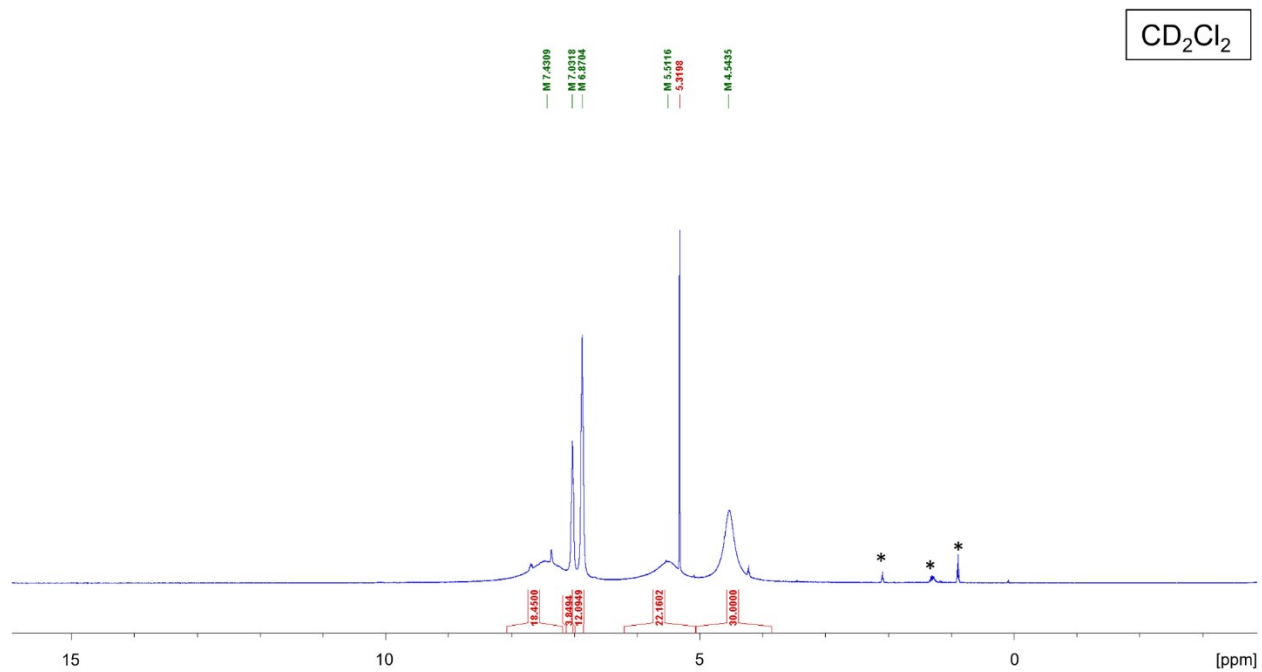

**Figure S15.**  $^1\text{H}$  NMR spectrum of the phenyl and THF resonances for  $\text{Nd}(\text{H}_3\text{BPPPh}_2\text{BH}_3)_3(\text{THF})_3$  (**4-THF**). The \* symbol indicates resonances assigned to residual  $\text{Et}_2\text{O}$  and pentane.

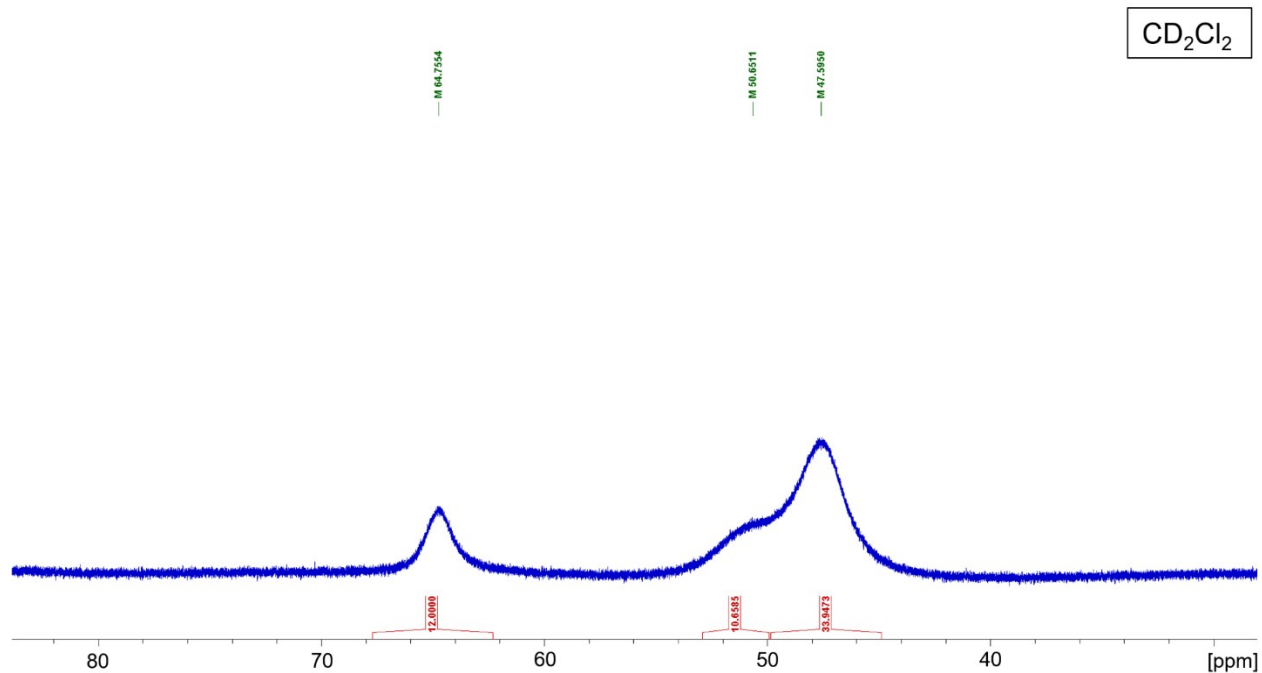

**Figure S16.**  $^1\text{H}$  NMR spectrum of the  $\text{BH}_3$  resonances for  $\text{Nd}(\text{H}_3\text{BPPPh}_2\text{BH}_3)_3(\text{THF})_3$  (**4-THF**).

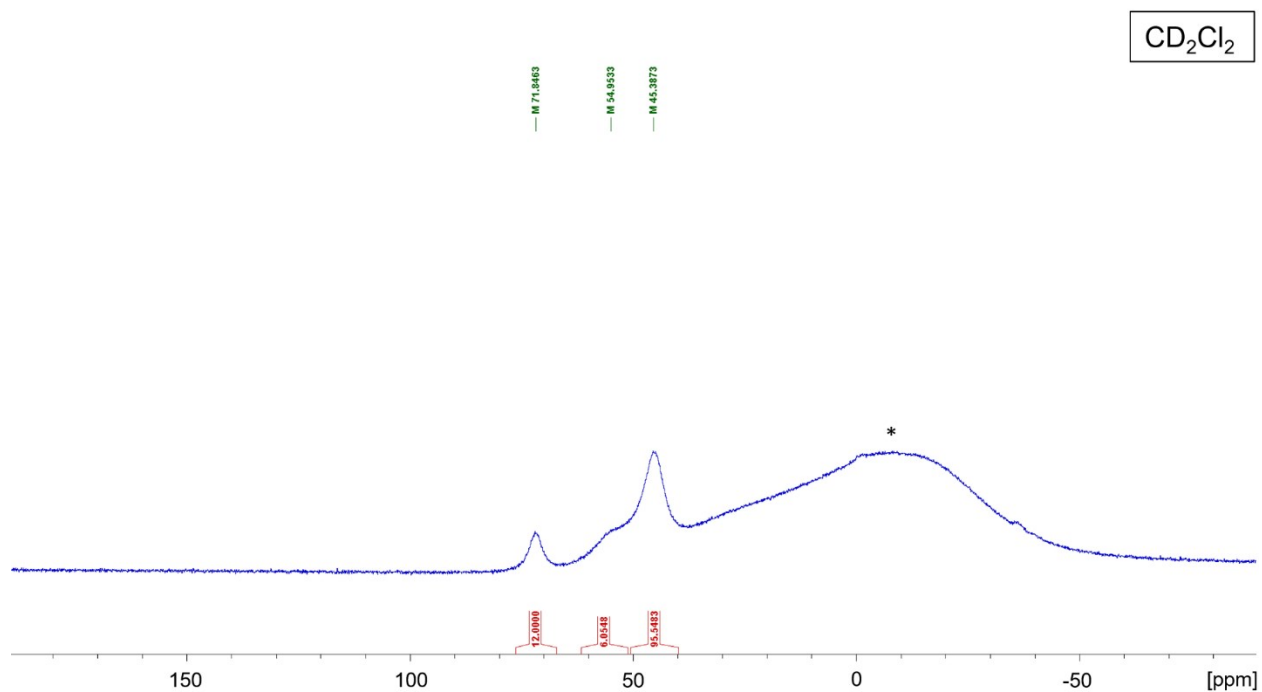

**Figure S17.**  $^{11}\text{B}$  NMR spectrum of the  $\text{BH}_3$  resonances for  $\text{Nd}(\text{H}_3\text{BPPPh}_2\text{BH}_3)_3(\text{THF})_3$  (**4-THF**). The \* symbol indicates a resonance assigned to borosilicate within the instrument.

## IR (ATR) Spectra

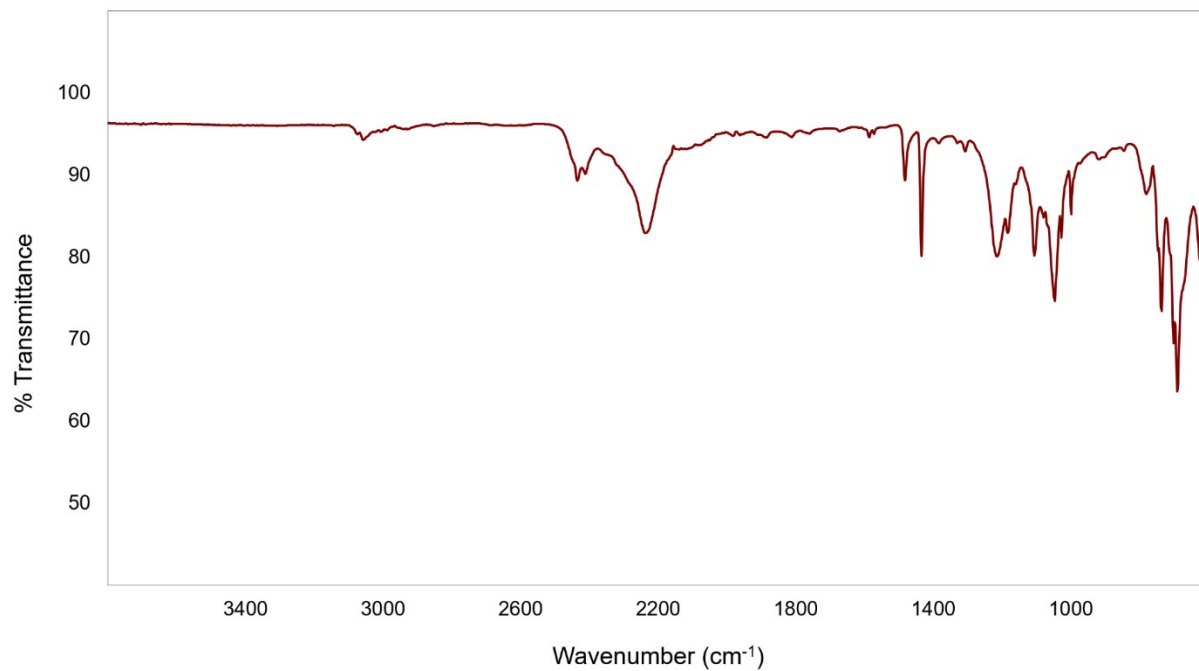

**Figure S18.** FTIR spectrum (ATR) for  $U(H_3BPPPh_2BH_3)_3$  for **1a** and **1b**.

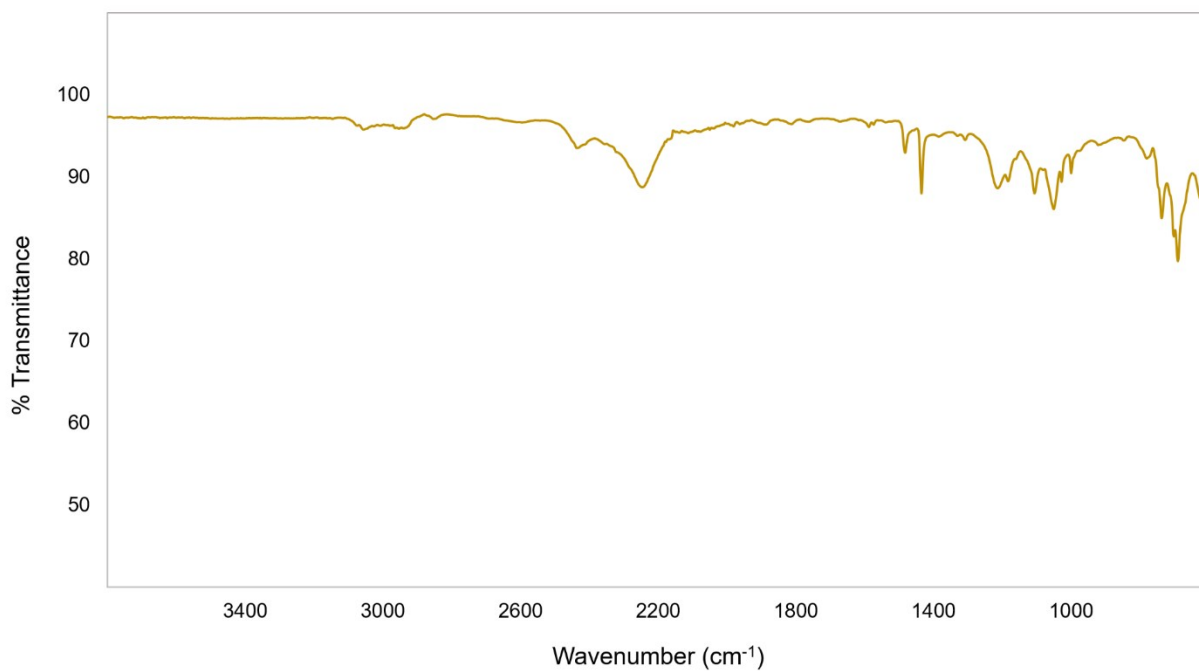

**Figure S19.** FTIR spectrum (ATR) for  $Ce(H_3BPPPh_2BH_3)_3$  (**2**).

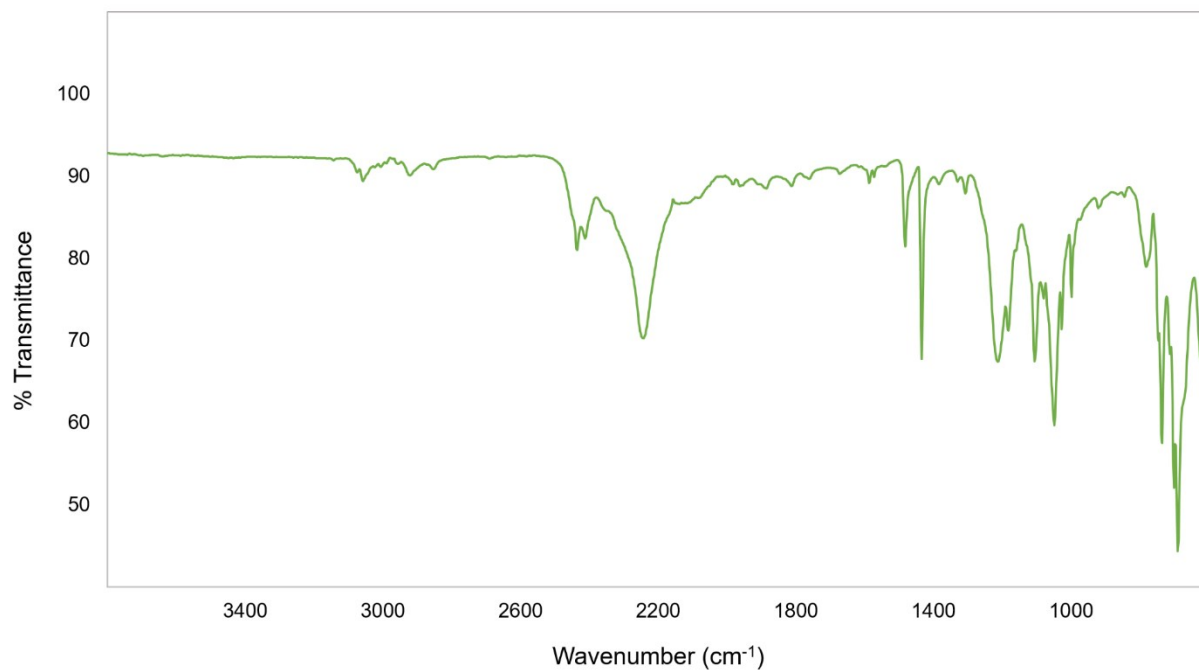

**Figure S20.** FTIR spectrum (ATR) for  $\text{Pr}(\text{H}_3\text{BPPH}_2\text{BH}_3)_3$  (**3**).

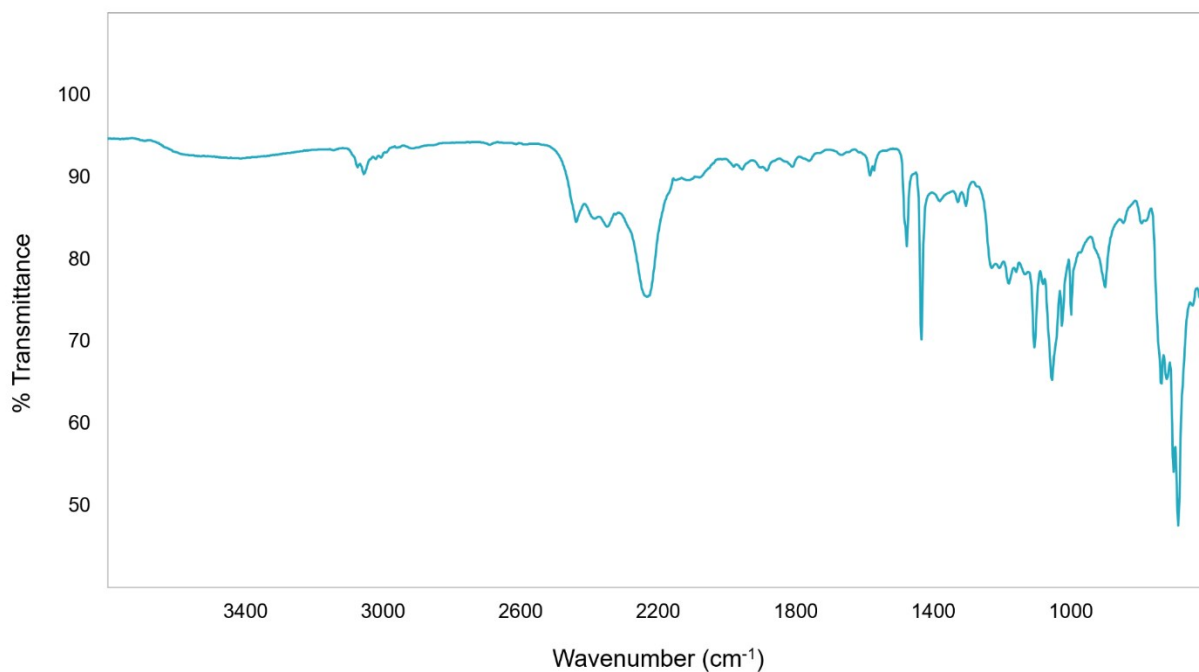

**Figure S21.** FTIR spectrum (ATR) for  $\text{Nd}(\text{H}_3\text{BPPH}_2\text{BH}_3)_3$  (**4**).

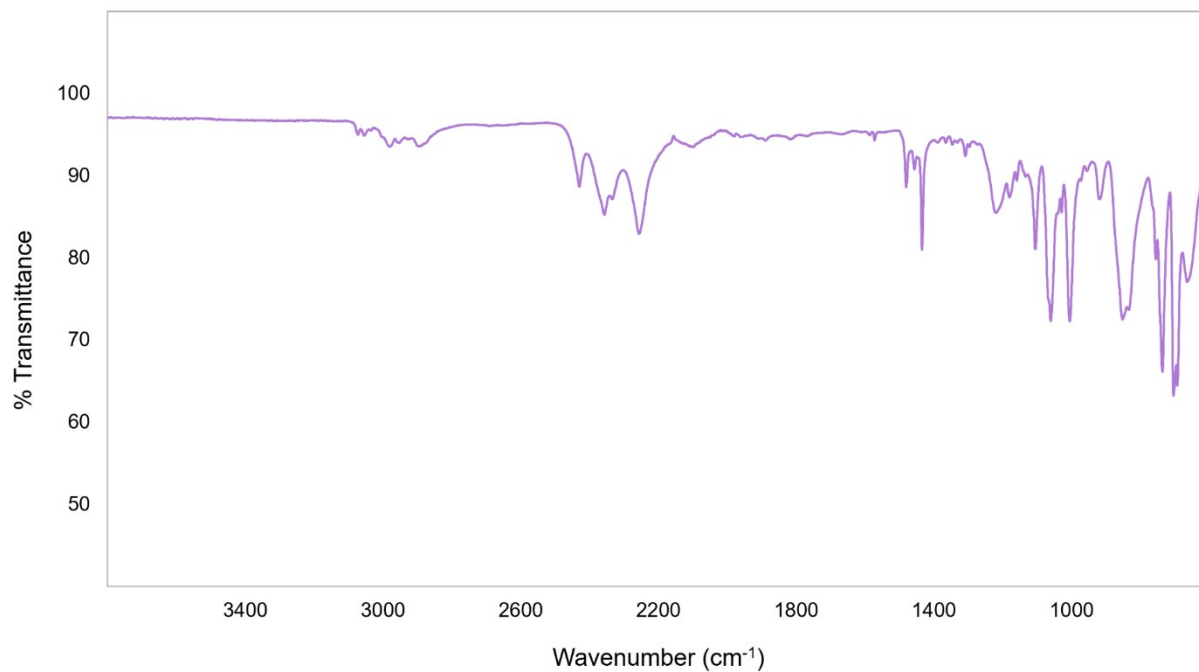

**Figure S22.** FTIR spectrum (ATR) for  $\text{Nd}(\text{H}_3\text{BPPH}_2\text{BH}_3)_3(\text{THF})_3$  (**4-THF**).

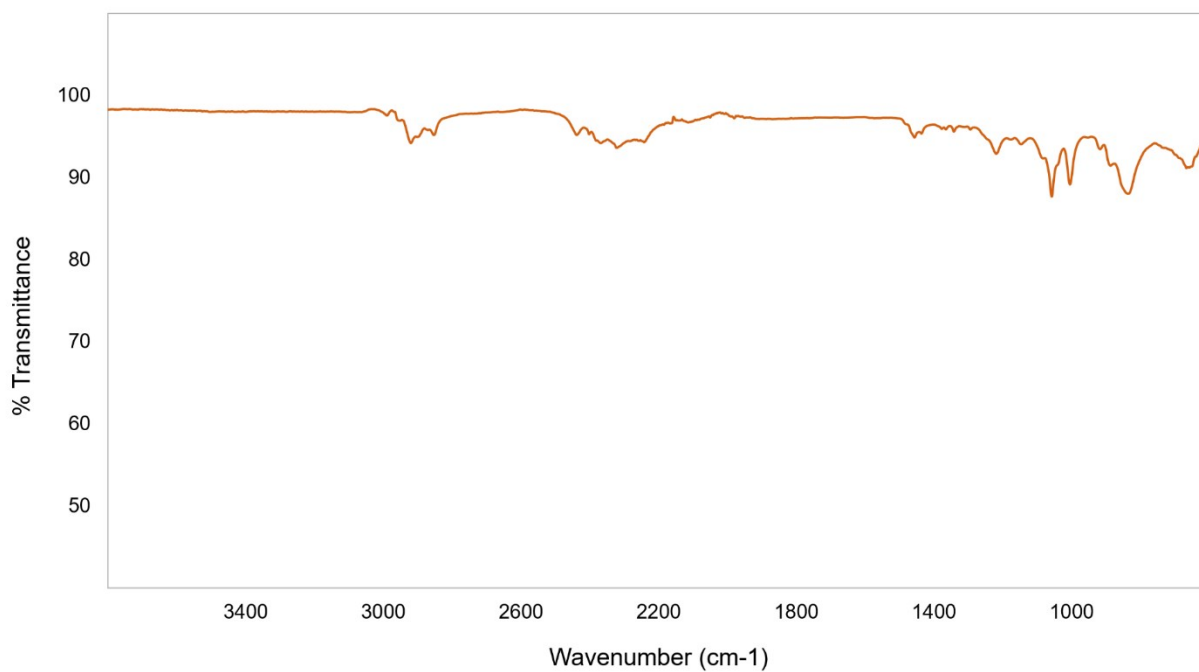

**Figure S23.** FTIR spectrum (ATR) for  $\text{U}(\text{H}_3\text{BPH}_2\text{BH}_3)_3\text{I}_2(\text{THF})_3$  (**5**).
